# Supplementary material for: Microbiome of a Reef-Building Coral Displays Signs of Acclimation to a Stressful Shallow Hydrothermal Vent Habitat
Source: Frontiers journal article supplement (doi:10.3389/fmars.2021.652633), 2021-09-15
Supplement: Table_1.XLSX [file Table_1.XLSX]

## Sheet: SharedInfoSheet-RevisedManuscri
SUPPLEMENTARY TABLE 3 Microbiome of a reef-building coral displays signs of acclimation to a stressful shallow hydrothermal vent habitat Alicia M. Reigel1*, David A. Paz-García2, Michael E. Hellberg3 1Appalachian State University, Biology, Boone, NC, USA 2CONACyT-Centro de Investigaciones Biológicas del Noroeste (CIBNOR), Laboratorio de Necton y Ecología de Arrecifes, La Paz, Baja California Sur,…
Ostreobium ASV #	Silva Database Taxonomic Classification	NCBI Taxonomic Identificaton	NCBI ID	NCBI % Identity	Sequence
O-ASV1	Bacteria, Cyanobacteria, Oxyphotobacteria, Chloroplast, Ostreobium HV05042	Ostreobium sp HV05042	KY509314.1	0.9803	TACGGAGGATGCAAGCGTTATTCGGAATTATTGGGCGTAAAGCGTCTGTAGGTTGCTTTTTAAGTCTACTGTTAAATATTAAGGCTTAACCTTAAAAAAGCGGTATGAAACTAAAAAGCTTGAGTTTAGTAGAGGTAGAGGGAATTCTCGGTGTAGTGGTGAAATGCGTAGAGATCGAGAAGAACACCAGTAGCGAAGGCGCTCTACTGGGCTAAAACTGACACTGAGAGACGAAAGCTAGGGGAGCAAATAGG
O-ASV2	Bacteria, Cyanobacteria, Oxyphotobacteria, Chloroplast, Ostreobium quekettii	Ostreobium quekettii	LT593849.1	0.9685	TACGGAAGATGCAAGCGTTATTCGGAATTATTGGGCGTAAAGCGTCTGTAGGTGGCTTTTTAAGTCTACTGTTAAATATCAAGGCTTAACCTTGGAGAAGCGGTATGAAACTAAAGGGCTTGAGTTTAGTAGAGGTAAAGGGAATTCTCGGTGTAGTGGTGAAATGCGTAGATATCGGGAAGAACACCTGTGGCGAAAGCGCTTTACTGGGCTAGAACTGACACTGAGAGACGAAAGCTAGGGGAGCAAATAGG
O-ASV3	Bacteria, Cyanobacteria, Oxyphotobacteria, Chloroplast, Ostreobium quekettii	uncultured Ostreobium spp.	MG011659.1	0.9843	TACGGAAGATGCAAGCGTTATTCGGAATTATTGGGCGTAAAGCGTCTGTAGGTGGTTTTTTAAGTCTGCTGTTAAAGGTCAAGGCTTAACCTTGAAAAAGCGGTATGAAACTAAAAAGCTTGAGTTTAGTAGAGGTAAAGGGAATTCTCGGTGTAGTGGTGAAATGCGTAGATATCGGGAAGAACACCTGTAGCGAAAGCGCTTTACTGGGCTAAAACTGACACTGAGAGACGAAAGCTAGGGGAGCGAATAGG
O-ASV4	Bacteria, Cyanobacteria, Oxyphotobacteria, Chloroplast, Ostreobium HV05042	Ostreobium sp HV05042	KY509314.1	0.9646	TACGGAGGATGCAAGCGTTATTCGGAATTATTGGGCGTAAAGCGTCTGTAGGTTGCTTTTTAAGTCTACTGTTAAATGTTAAGGCTTAACCTTAAAAGAGCGGTATGAAACTAAAAAGCTTGAGTTTAGTAGAGGTAGAGGGAATTCTCGGTGTAGTGGTGAAATGCGTAGAGATCGAGAAGAACACCAGTTGCGAAAGCGCTCTGCTGGGCTAATACTGACACTGAGAGACGAAAGCTAGGGGAGCAAATAGG
O-ASV5	Bacteria, Cyanobacteria, Oxyphotobacteria, Chloroplast, Ostreobium HV05042	Ostreobium sp HV05042	KY509314.1	0.9685	TACGGAGGATGCAAGCGTTATTCGGAATTATTGGGCGTAAAGCGTCTGTAGGTTGCTTTTTAAGTCTACTGTTAAATGTTAAGGCTTAACCTTAAAAGAGCGGTATGAAACTAAAAAGCTTGAGTTTAGTAGAGGTAGAGGGAATTCTCGGTGTAGTGGTGAAATGCGTAGAGATCGAGAAGAACACCAGTTGCGAAAGCGCTCTACTGGGCTAATACTGACACTGAGAGACGAAAGCTAGGGGAGCAAATAGG
O-ASV6	Bacteria, Cyanobacteria, Oxyphotobacteria, Chloroplast, Ostreobium HV05042	Ostreobium sp HV05042	KY509314.1	0.9799	TACTTAGGATGCAAGCGTTATTCGGAATTATTGGGCGTAAAGCGTCTGTAGGTTGCTTTTTAAGTCTACTGTTAAATATTAAGGCTTAACCTTAAAAAAGCGGTATGAAACTAAAAAGCTTGAGTTTAGTAGAGGTAGAGGGAATTCTCGGTGTAGTGGTGAAATGCGTAGAGATCGAGAAGAACACCAGTAGCGAAGGCGCTCTACTGGGCTAAAACTGACACTGAGAGACGAAAGCTAGGGGAGCAAATAGG
O-ASV7	Bacteria, Cyanobacteria, Oxyphotobacteria, Chloroplast, Ostreobium HV05042	Ostreobium sp HV05042	KY509314.1	0.9764	TACGGAGGATGCAAGCGTTATTCGGAATTATTGGGCGTAAAGCGTCTGTAGGTTGCTTTTTAAGTCTACTGTTAAATATTAAGGCTTAACCTTAAAAAAGCGGTATGAAACTAAAAAGCTTGAGTTTAGCAGAGGTAGAGGGAATTCTCGGTGTAGTGGTGAAATGCGTAGAGATCGAGAAGAACACCAGTAGCGAAGGCGCTCTACTGGGCTAAAACTGACACTGAGAGACGAAAGCTAGGGGAGCAAATAGG
O-ASV8	Bacteria, Cyanobacteria, Oxyphotobacteria, Chloroplast, Ostreobium HV05042	uncultured Ostreobium spp.	MG011659.1	0.9764	TACGGAAGATGCAAGCGTTATTCGGAATTATTGGGCGTAAAGCGTCTGTAGGTGGCTTTTTAAGTCTATTGTTAAATATTAAGGCTCAACCTTGAAGAAGCGGTATGAAACTAAAAAGCTTGAGTTTAGTAGAGGTAAAGGGAATTCTCGGTGTAGTGGTGAAATGCGTAGATATCGGGAAGAACACCTGTGGCGAAAGCGCTTTACTGGGCTAATACTGACACTGAGAGACGAAAGCTAGGGGAGCGAATAGG
O-ASV9	Bacteria, Cyanobacteria, Oxyphotobacteria, Chloroplast, Ostreobium HV05042	Ostreobium sp HV05042	KY509314.1	0.9764	TACGGAGGATGCAAGCGTTATTCGGAATTATTGGGCGTAAAGCGTCTGTAGGTTGCTTTTTAAGTCTACTGTTAAATATTAAGGCTTAACCTTAAAAAAGCGGTACGAAACTAAAAAGCTTGAGTTTAGTAGAGGTAGAGGGAATTCTCGGTGTAGTGGTGAAATGCGTAGAGATCGAGAAGAACACCAGTAGCGAAGGCGCTCTACTGGGCTAAAACTGACACTGAGAGACGAAAGCTAGGGGAGCAAATAGG
O-ASV10	Bacteria, Cyanobacteria, Oxyphotobacteria, Chloroplast, Ostreobium HV05042	Ostreobium sp HV05042	KY509314.1	0.9764	TACGGAGGATGCAAGCGTTATTCGGAATTATTGGGCGTAAAGCGTCTGTAGGTTGCTTTTTAAGTCTACTGTTAAATATTAAGGCTTAACCTTAAAAAAGCGGTATGAAACTAAAAAGCTTGAGTTTAGTAGAGGTAGAGGGAATTCTCGGTGTAGTGGTGAAATGCGTAGAGATCGAGAAGAACACCAGTAGCGAAGGCGCTCTACTGGGCTAAAACTGACACTGAGAGACGAAAGCTATGGGAGCAAATAGG
O-ASV11	Bacteria, Cyanobacteria, Oxyphotobacteria, Chloroplast, Ostreobium quekettii	Ostreobium quekettii	LT593849.1	0.9646	TACGGAAGATGCAAGCGCTATTCGGAATTATTGGGCGTAAAGCGTCTGTAGGTGGCTTTTTAAGTCTACTGTTAAATATCAAGGCTTAACCTTGGAGAAGCGGTATGAAACTAAAGGGCTTGAGTTTAGTAGAGGTAAAGGGAATTCTCGGTGTAGTGGTGAAATGCGTAGATATCGGGAAGAACACCTGTGGCGAAAGCGCTTTACTGGGCTAGAACTGACACTGAGAGACGAAAGCTAGGGGAGCAAATAGG
O-ASV12	Bacteria, Cyanobacteria, Oxyphotobacteria, Chloroplast, Ostreobium HV05042	Ostreobium sp HV05042	KY509314.1	0.9764	TACGGAGGATGCAAGCGTTATTCGGAATTATTGGGCGTAAAGTGTCTGTAGGTTGCTTTTTAAGTCTACTGTTAAATATTAAGGCTTAACCTTAAAAAAGCGGTATGAAACTAAAAAGCTTGAGTTTAGTAGAGGTAGAGGGAATTCTCGGTGTAGTGGTGAAATGCGTAGAGATCGAGAAGAACACCAGTAGCGAAGGCGCTCTACTGGGCTAAAACTGACACTGAGAGACGAAAGCTAGGGGAGCAAATAGG
O-ASV13	Bacteria, Cyanobacteria, Oxyphotobacteria, Chloroplast, Ostreobium quekettii	uncultured Ostreobium spp.	MG011659.1	0.9884	TACGGAAGATGCAAGCGTTATTCGGAATTATTGGGCGTAAAGCGTCTGTAGGTGGCTTTTTAAGTCTACTGTTAAATGTCAAGGCTTAACCTTGAAAAAGCGGTATGAAACTAAAAAGCTTGAGTTTAGTAGAGGTAAAGGGAATTCTCGGTGTAGTGGTGAAATGCGTAGATATCGGGAAGAACACCTGTGGCGAAAGCGCTTTACTGGGCTAAAACTGACACTGAGAGACGAAAGCTAGGGGAGCAAATAGG
O-ASV14	Bacteria, Cyanobacteria, Oxyphotobacteria, Chloroplast, Ostreobium HV05042	Ostreobium sp HV05042	KY509314.1	0.9764	TACGGAGGATGCAAGCGTTATTCGGAATTATTGGGCGTAAAGCGTCTGTAGGTTGCTTTTTAAGTCTACTGTTAAATATTAAGGCTTAACCTTAAAAAAGCGGTATGAAACTAAAAAGCTTGAGTTTAGTAAAGGTAGAGGGAATTCTCGGTGTAGTGGTGAAATGCGTAGAGATCGAGAAGAACACCAGTAGCGAAGGCGCTCTACTGGGCTAAAACTGACACTGAGAGACGAAAGCTAGGGGAGCAAATAGG
O-ASV15	Bacteria, Cyanobacteria, Oxyphotobacteria, Chloroplast, Ostreobium HV05042	Ostreobium sp HV05042	KY509314.1	0.9764	TACGGAGGATGCAAGCGTTATTCGGAATTATTGGGCGTAAAGCGTCTGTAGGTTGCTCTTTAAGTCTACTGTTAAATATTAAGGCTTAACCTTAAAAAAGCGGTATGAAACTAAAAAGCTTGAGTTTAGTAGAGGTAGAGGGAATTCTCGGTGTAGTGGTGAAATGCGTAGAGATCGAGAAGAACACCAGTAGCGAAGGCGCTCTACTGGGCTAAAACTGACACTGAGAGACGAAAGCTAGGGGAGCAAATAGG
O-ASV16	Bacteria, Cyanobacteria, Oxyphotobacteria, Chloroplast, Ostreobium HV05042	Ostreobium sp HV05042	KY509314.1	0.9764	TACGGAGGATGCAAGCGTTATTCGGAATTATTGGGCGTAAAGCGTCTGTAGGTTGCTTTTTAAGTCTACTGTTAAATATTAAGGCTTAACCTTAAAAAAGCGGTATGAAACTAAAAGGCTTGAGTTTAGTAGAGGTAGAGGGAATTCTCGGTGTAGTGGTGAAATGCGTAGAGATCGAGAAGAACACCAGTAGCGAAGGCGCTCTACTGGGCTAAAACTGACACTGAGAGACGAAAGCTAGGGGAGCAAATAGG
O-ASV17	Bacteria, Cyanobacteria, Oxyphotobacteria, Chloroplast, Ostreobium quekettii	Ostreobium quekettii	LT593849.1	0.9646	TACGGAAGATGCAAGCGTTATTCGGAATTATTGGGCGTAAAGCGTCTGTAGGTGGCTTTTTAAGTCTACTGTTAAATATCAAGGCTTAACCTTGGAGAAGCGGTATGAAACTAAGGGGCTTGAGTTTAGTAGAGGTAAAGGGAATTCTCGGTGTAGTGGTGAAATGCGTAGATATCGGGAAGAACACCTGTGGCGAAAGCGCTTTACTGGGCTAGAACTGACACTGAGAGACGAAAGCTAGGGGAGCAAATAGG
O-ASV18	Bacteria, Cyanobacteria, Oxyphotobacteria, Chloroplast, Ostreobium quekettii	uncultured Ostreobium spp.	MG011659.1	0.9606	TACGGAAGATGCAAGCGTTATTCGGAATTATTGGGCGTAAAGCGTCTGTAGGTGGCTTTTTAAGTCTACTGTTAAATATCAAGGCTTAACCTTGGAGAAGCGGTATGAAACTAAAGGGCTTGAGTTTAGTAGAGGTAAAGGGAATTCTCGGTGCAGTGGTGAAATGCGTAGATATCGGGAAGAACACCTGTGGCGAAAGCGCTTTACTGGGCTAGAACTGACACTGAGAGACGAAAGCTAGGGGAGCAAATAGG
O-ASV19	Bacteria, Cyanobacteria, Oxyphotobacteria, Chloroplast, Ostreobium HV05042	Ostreobium sp HV05042	KY509314.1	0.9764	TACGGAGGATGCAAGCGTTATTCGGAATTATTGGGCGTAAAGCGTCTGTAGGTTGCTTTTTAAGTCTACTGTTAAATATTAAGGCTTAACCTTAAAAAAGCGGTATGAAACTAAAAAGCTTGAGTTTAGTAGAGGTAGAGGGAATTCTCGGTGTAGTGGTGAAATGCGTAGAGATCGAGAAGAACACCAGTAGCGAAGGCGCTCTACTGGGCTAAAACTGACACTGAGAAACGAAAGCTAGGGGAGCAAATAGG
O-ASV20	Bacteria, Cyanobacteria, Oxyphotobacteria, Chloroplast, Ostreobium HV05042	Ostreobium sp HV05042	KY509314.1	0.98	GCCTGAGGATGCAAGCGTTATTCGGAATTATTGGGCGTAAAGCGTCTGTAGGTTGCTTTTTAAGTCTACTGTTAAATATTAAGGCTTAACCTTAAAAAAGCGGTATGAAACTAAAAAGCTTGAGTTTAGTAGAGGTAGAGGGAATTCTCGGTGTAGTGGTGAAATGCGTAGAGATCGAGAAGAACACCAGTAGCGAAGGCGCTCTACTGGGCTAAAACTGACACTGAGAGACGAAAGCTAGGGGAGCAAATAGG
O-ASV21	Bacteria, Cyanobacteria, Oxyphotobacteria, Chloroplast, Ostreobium quekettii	Ostreobium quekettii	LT593849.1	0.9646	TACGGAAGATGCAAGCGTTATTCGGAATTATTGGGCGTAAAGCGTCTGTAGGTGGCTTTTTAAGTCTACTGTTAAATATCAAGGCTTAACCTTGGAGAAGCGGTATGAAACTAAAGGGCTTGAGTTTAGTAGAGGTAAAGGGAATTCTCGGTGTAGTGGAGAAATGCGTAGATATCGGGAAGAACACCTGTGGCGAAAGCGCTTTACTGGGCTAGAACTGACACTGAGAGACGAAAGCTAGGGGAGCAAATAGG
O-ASV22	Bacteria, Cyanobacteria, Oxyphotobacteria, Chloroplast, Ostreobium HV05042	Ostreobium sp HV05042	KY509314.1	0.9764	TACGGAGGATGCAAGCGTTATTCGGAATTATTGGGCGTAAAGCGTCTGTAGGTCGCTTTTTAAGTCTACTGTTAAATATTAAGGCTTAACCTTAAAAAAGCGGTATGAAACTAAAAAGCTTGAGTTTAGTAGAGGTAGAGGGAGTTCTCGGTGTAGTGGTGAAATGCGTAGAGATCGAGAAGAACACCAGTAGCGAAGGCGCTCTACTGGGCTAAAACTGACACTGAGAGACGAAAGCTAGGGGAGCAAATAGG
O-ASV23	Bacteria, Cyanobacteria, Oxyphotobacteria, Chloroplast, Ostreobium quekettii	Ostreobium quekettii	LT593849.1	0.9646	TACGGAAGATGCAAGCGTTATTCGGAATTATTGGGCGTAAAGCGTCTGTAGGTCGCTTTTTAAGTCTACTGTTAAATATCAAGGCTTAACCTTGGAGAAGCGGTATGAAACTAAAGGGCTTGAGTTTAGTAGAGGTAAAGGGAATTCTCGGTGTAGTGGTGAAATGCGTAGATATCGGGAAGAACACCTGTGGCGAAAGCGCTTTACTGGGCTAGAACTGACACTGAGAGACGAAAGCTAGGGGAGCAAATAGG
O-ASV24	Bacteria, Cyanobacteria, Oxyphotobacteria, Chloroplast, Ostreobium quekettii	Ostreobium quekettii	LT593849.1	0.9646	TACGGAAGATGCAAGCGTTATTCGGAATCATTGGGCGTAAAGCGTCTGTAGGTGGCTTTTTAAGTCTACTGTTAAATATCAAGGCTTAACCTTGGAGAAGCGGTATGAAACTAAAGGGCTTGAGTTTAGTAGAGGTAAAGGGAATTCTCGGTGTAGTGGTGAAATGCGTAGATATCGGGAAGAACACCTGTGGCGAAAGCGCTTTACTGGGCTAGAACTGACACTGAGAGACGAAAGCTAGGGGAGCAAATAGG
O-ASV25	Bacteria, Cyanobacteria, Oxyphotobacteria, Chloroplast, Ostreobium quekettii	uncultured Ostreobium spp.	MG011659.1	0.9724	TACGGAAGATGCAAGCGTTATTCGGAATTATTGGGCGTAAAGCGTCTGTAGGTGGCTTTTTAAGTCTATTGTTAAATATTAAGGCTCAACCTTGAAGAAGCGGTATGAAACTAAAAAGCTTGAGTTTAGTAGAGGTAAAGGGAATTCTCTGTGTAGTGGTGAAATGCGTAGATATCGGGAAGAACACCTGTGGCGAAAGCGCTTTACTGGGCTAATACTGACACTGAGAGACGAAAGCTAGGGGAGCGAATAGG
O-ASV26	Bacteria, Cyanobacteria, Oxyphotobacteria, Chloroplast, Ostreobium quekettii	uncultured Ostreobium spp.	MG011659.1	0.9843	TACGGAAGATGCAAGCGTTATTCGGAATTATTGGGCGTAAAGCGTCTGTAGGTGGCTTTTTAAGTCTACTGTTAAATATCAAGGCTTAACCTTGAAACAGCGGCATGAAACTAAAAAGCTTGAGTTTAGTAGAGGTAAAGGGAATTCTCGGTGTAGTGGTGAAATGCGTAGATATCGGGAAGAACACCTGTAGCGAAAGCGCTTTACTGGGCTAAAACTGACACTGAGAGACGAAAGCTAGGGGAGCGAATAGG
O-ASV27	Bacteria, Cyanobacteria, Oxyphotobacteria, Chloroplast, Ostreobium HV05042	Ostreobium sp HV05042	KY509314.1	0.972	TACGGAGGATGCAAGCGTTATTCGGAATTATTGGGCGTAAAGCGTCTGTAGGTTGCTTTTTAAGTCTACTGTTAAATATTAAGGCTTAACCTTGAAAAAGCGGTATGAAACTAAAAAGCTTGAGTTTAGTAGAGGTAGAGGGAATTCTCGGTGTAGTGGTGAAATGCGTAGAGACCGAGAAGAACACCAGTAGCGAAGGCGCTCTACTGGGCTAAAACTGACACTGAGAGACGAAAGCTAGGGGAGCAAATAGG
O-ASV28	Bacteria, Cyanobacteria, Oxyphotobacteria, Chloroplast, Ostreobium quekettii	Ostreobium quekettii	LT593849.1	0.9646	TACGGAAGATGCAAGCGTTATGCGGAATTATTGGGCGTAAAGCGTCTGTAGGTGGCTTTTTAAGTCTACTGTTAAATATCAAGGCTTAACCTTGGAGAAGCGGTATGAAACTAAAGGGCTTGAGTTTAGTAGAGGTAAAGGGAATTCTCGGTGTAGTGGTGAAATGCGTAGATATCGGGAAGAACACCTGTGGCGAAAGCGCTTTACTGGGCTAGAACTGACACTGAGAGACGAAAGCTAGGGGAGCAAATAGG
O-ASV29	Bacteria, Cyanobacteria, Oxyphotobacteria, Chloroplast, Ostreobium HV05042	Ostreobium sp HV05042	KY509314.1	0.9803	TACGGAGGATGCAAGCGTTATTCGGAATTATTGGGCGTAAAGCGTCTGTAGGTTGCTTCTTAAGTCTACTGTTAAATATTAAGGCTTAACCTTAAAAAAGCGGTATGAAACTAAAAAGCTTGAGTTTAGTAGAGGTAGAGGGAATTCTCGGTGTAGTGGTGAAATGCGTAGAGATCGAGAAGAACACCGGTAGCGAAGGCGCTCTACTGGGCTAAAACTGACACTGAGAGACGAAAGCTAGGGGAGCAAATAGG
O-ASV30	Bacteria, Cyanobacteria, Oxyphotobacteria, Chloroplast, Ostreobium HV05042	Ostreobium sp HV05042	KY509314.1	0.9764	TACGGAGGATGCAAGCGTTATTCGGAATTATTGGGCGTAAAGCGTCTGTAGGTTGCTTTTTAAGTCTACTGTTAAATATTATGGCTTAACCTTAAAAAAGCGGTATGAAACTAAAAAGCTTGAGTTTAGTAGAGGTAGAGGGAATTCTCGGTGTAGTGGTGAAATGCGTAGAGATCGAGAAGAACACCAGTAGCGAAGGCGCTCTACTGGGCTAAAACTGACACTGAGAGACGAAAGCTAGGGGAGCAAATAGG
O-ASV31	Bacteria, Cyanobacteria, Oxyphotobacteria, Chloroplast, Ostreobium HV05042	Ostreobium sp HV05042	KY509314.1	0.9724	TACGGAGGATGCAAGCGTTATTCGGAATTATTGGGCGTAAAGCGTCTGTAGGTTGCTTCTTAAGTCTACTGTTAAATATTAAGGCTTAACCTTAAAAAAGCGGTATGAAACTAAAAAGCTTGAGTTTAGTAGAGGTAGAGGGAATTCTCGGTGTAGTGGTGAAATGCGTAGAGATCGAGGAGAACACCAGTAGCGAAGGCGCTCTACTGGGCTAAAACTGACACTGAGAGACGAAAGCTAGGGGAGCAAATAGG
O-ASV32	Bacteria, Cyanobacteria, Oxyphotobacteria, Chloroplast, Ostreobium HV05042	Ostreobium sp HV05042	KY509314.1	0.9724	TACGGAGGATGCAAGCGTTATTCGGAATTATTGGGCGTAAAGCGTCTGTAGGTTGCTTTTTAAGTCTACTGTTAAATATTAAGGCTTAACCTTAAAAAAGCGGTATGAAACTAAAAAGCTTGAGTTTAGTAGAGGTAGGGGGAATTCTCGGTGTAGTGGTGAAATGCGTAGAGATCGAGAGGAACACCAGTAGCGAAGGCGCTCTACTGGGCTAAAACTGACACTGAGAGACGAAAGCTAGGGGAGCAAATAGG
O-ASV33	Bacteria, Cyanobacteria, Oxyphotobacteria, Chloroplast, Ostreobium HV05042	Ostreobium sp HV05042	KY509314.1	0.9724	TACGGAGGATGCAAGCGTTATTCGGAATTATTGGGCGTAAAGCGTCTGTAGGTTGCTTTTTAAGTCTACTGTTAAATATTAAGGCTTAACCTTAAAAAAGCGGTATGGAACTAAAAAGCTTGAGTTTAGTAGAGGTAGAGGGAATTCTCGGTGTGGTGGTGAAATGCGTAGAGATCGAGAAGAACACCAGTAGCGAAGGCGCTCTACTGGGCTAAAACTGACACTGAGAGACGAAAGCTAGGGGAGCAAATAGG
O-ASV34	Bacteria, Cyanobacteria, Oxyphotobacteria, Chloroplast, Ostreobium HV05042	Ostreobium sp HV05042	KY509314.1	0.9606	TACGGAGGATGCAAGCGTTATTCGGAATTATTGGGCGTAAAGCGTCTGTAGGTTGCTTTTTAAGTCTACTGTTAAATGTTAAGGCTTAACCTTAAAAGAGCGGTATGAAACTAAAAAGCTTGAGTTTAGTAGAGGTAGAGGGAATTCTCGGTGTAGTGGTGAAATGCGTAGAGATCGAGAAGAACACCAGTTGCGAAAGCGCACTGCTGGGCTAATACTGACACTGAGAGACGAAAGCTAGGGGAGCAAATAGG
O-ASV35	Bacteria, Cyanobacteria, Oxyphotobacteria, Chloroplast, Ostreobium HV05042	Ostreobium sp HV05042	KY509314.1	0.9724	TACGGAGGATGCAAGCGTTATTCGGAATTATTGGGCGTAAAGCGTCTGTAGGTTGCTTTTTAAGTCTACTGTTAAATACTAAGGCTTAACCTTAAAAAAGCGGTATGAAACTAAAAAGCTTGAGTTTAGTAGAAGTAGAGGGAATTCTCGGTGTAGTGGTGAAATGCGTAGAGATCGAGAAGAACACCAGTAGCGAAGGCGCTCTACTGGGCTAAAACTGACACTGAGAGACGAAAGCTAGGGGAGCAAATAGG
O-ASV36	Bacteria, Cyanobacteria, Oxyphotobacteria, Chloroplast, Ostreobium HV05042	Ostreobium sp HV05042	KY509314.1	0.9724	TACGGAGGATGCAAGCGTTATTCGGAATTATTGGGCGTAAAGCGTCTGTAGGTTGCTTTTTAAGTCTACTGTTAAACATTAAGGCTTAACCTTAAAAAAGCGGTATGAAACTAAAAAGCTTGAGTTTAGTAGAGGTAAAGGGAATTCTCGGTGTAGTGGTGAAATGCGTAGAGATCGAGAAGAACACCAGTAGCGAAGGCGCTCTACTGGGCTAAAACTGACACTGAGAGACGAAAGCTAGGGGAGCAAATAGG
O-ASV37	Bacteria, Cyanobacteria, Oxyphotobacteria, Chloroplast, Ostreobium quekettii	uncultured Ostreobium spp.	MG011659.1	0.9803	TACGGAAGATGCAAGCGTTATTCGGAATTATTGGGCGTAAAGCGTCTGTAGGTGGCTTTTTAAGTCTACTGTTAAATATCAAGGCTTAACCTTGAAACAGCGGCATGAAACTAAAAAGCTTGAGTTTAGTAGAGGTAAAGGGAATTCTCGGTGTAGTGGTGAAATGCGTAGATATCGGGAAGAACACCTGTAGCGAAGGCGCTTTACTGGGCTAAAACTGACACTGAGAGACGAAAGCTAGGGGAGCGAATAGG
O-ASV38	Bacteria, Cyanobacteria, Oxyphotobacteria, Chloroplast, Ostreobium HV05042	Ostreobium sp HV05042	KY509314.1	0.9724	TACGGAGGATGCAAGCGTTATTCGGAATTATTGGGCGTAAAGCGTCTGTAGATTGCTTTTTAAGTCTACTGTTAAATATTAAGGCTTAACCTTAAAGAAGCGGTATGAAACTAAAAAGCTTGAGTTTAGTAGAGGTAGAGGGAATTCTCGGTGTAGTGGTGAAATGCGTAGAGATCGAGAAGAACACCAGTAGCGAAGGCGCTCTACTGGGCTAAAACTGACACTGAGAGACGAAAGCTAGGGGAGCAAATAGG
O-ASV39	Bacteria, Cyanobacteria, Oxyphotobacteria, Chloroplast, Ostreobium HV05042	Ostreobium sp HV05042	KY509314.1	0.9724	TACGGAGGATGCAAGCGTTATTCGGAATTATTGGGCGTAAAGCGTCTGTAGGTTGCTTTTTAAGTCTACTGTTAAATATTAAGGCTTAACCTTAAAAAAGCGGTATGAAACTAAAAAGCTTGAGTTTAGTAGAGGTAGAGGGAATTCTCGGTGTAGTGGTGAAATGCGTAGAGATCGAGGAGAACGCCAGTAGCGAAGGCGCTCTACTGGGCTAAAACTGACACTGAGAGACGAAAGCTAGGGGAGCAAATAGG
O-ASV40	Bacteria, Cyanobacteria, Oxyphotobacteria, Chloroplast, Ostreobium quekettii	Ostreobium quekettii	LT593849.1	0.9606	TACGGAAGATGCAAGCGTTATTCGGAATTATTGGGCGTAAAGCGTCTGTAGGTGGCTTTTTAAGTCTACTGTTAAGTATCAAGGCTTAACCTTGGAGAAGCGGTATGAAACTAAAGGGCTTGAGTTTAGTAGAGGTAAAGGGAATTCTCGGTGTAGTGGTGAAATGCGTAGATATAGGGAAGAACACCTGTGGCGAAAGCGCTTTACTGGGCTAGAACTGACACTGAGAGACGAAAGCTAGGGGAGCAAATAGG
O-ASV41	Bacteria, Cyanobacteria, Oxyphotobacteria, Chloroplast, Ostreobium quekettii	uncultured Ostreobium spp.	MG011659.1	0.9843	TACGGAAGATGCAAGCGTTATTCGGAATTATTGGGCGTAAAGCGTCTGTAGGTGGCTTTTTAAGTCTACTGTTAAAGGTCAAGGCTTAACCTTGAAAAAGCGGTATGAAACTAAAAAGCTTGAGTTTAGTAGAGGTAAAGGGAATTCTCGGTGTAGTGGTGAAATGCGTAGATATCGGGAAGAACACCTGTGGCGAAAGCGCTTTACTGGGCTAAAACTGACACTGAGAGACGAAAGCTAGGGGAGCAAATAGG
O-ASV42	Bacteria, Cyanobacteria, Oxyphotobacteria, Chloroplast, Ostreobium quekettii	uncultured Ostreobium spp.	MG011659.1	0.9843	TACGGAAGATGCAAGCGTTATTCGGAATTATTGGGCGTAAAGCGTCTGTAGGTGGCTTTTTAAGTCTACTGTTAAATGTCAAGGCTTAACCTTGAAAAAGCGGTATGAAACTAAAAAGCTTGAGTTTAGTAGAGGTAAAGGGAATTCTCGGTGTAGTGGTGAAATGCATAGATATCGGGAAGAACACCTGTGGCGAAAGCGCTTTACTGGGCTAAAACTGACACTGAGAGACGAAAGCTAGGGGAGCAAATAGG
O-ASV43	Bacteria, Cyanobacteria, Oxyphotobacteria, Chloroplast, Ostreobium quekettii	Ostreobium quekettii	LT593849.1	0.9606	TACGGAAGATGCAAGCGTTATTCGGAATTATTGGGCGTAAAGCGTCTGTAGGTGGCTTTTTAAGTCAACTGTTAAATATCAAGGCTTAACCTTGGAGAAGCGGTATGGAACTAAAGGGCTTGAGTTTAGTAGAGGTAAAGGGAATTCTCGGTGTAGTGGTGAAATGCGTAGATATCGGGAAGAACACCTGTGGCGAAAGCGCTTTACTGGGCTAGAACTGACACTGAGAGACGAAAGCTAGGGGAGCAAATAGG
O-ASV44	Bacteria, Cyanobacteria, Oxyphotobacteria, Chloroplast, Ostreobium HV05042	Ostreobium sp HV05042	KY509314.1	0.9724	TACGGAGGATGCAAGCGTTATTCGGAATTATTGGGCGTAAAGCGTCTGTAGGTTGCTTTTTAAGTCTACTGTTAAATATTAAGGCTTAACCTTAAAAAAGCGGTATGAAACTAAAAAGCTTGAGTTTAGTAGAGGTAGAGGGAATTCTCGGTGTAGTGGTGAAATGCGTAGAGATCGAGAAGAACACCAGTAGCGAAGGCGCTCTACTGGGCTAAAACTGACACTGAGAGACCAAAGCTGGGGGAGCAAATAGG
O-ASV45	Bacteria, Cyanobacteria, Oxyphotobacteria, Chloroplast, Ostreobium HV05042	Ostreobium sp HV05042	KY509314.1	0.9685	TACGGAGGATGCAAGCGTTATTCGGAATTATTGGGCGTAAAGCGTCCGTAGGTTGCTTTTTAAGTCTACTGTTAAATATTAAGGCTTAACCTTAAAAAAGCGGTATGAAACTAAAAAGCTTGAGTTTAGTAGAGGTAGAGGGAATTCTCGGTGTAGTGGTGAAATGCGTAGAGATCGAGAAGAACACCAGTAGCGAAGGCGCTCTACTAGGCTAAAACTGACACTGAGAGACGAAAGCTAGGGGAGCGAATAGG
O-ASV46	Bacteria, Cyanobacteria, Oxyphotobacteria, Chloroplast, Ostreobium HV05042	Ostreobium sp HV05042	KY509314.1	0.9685	TACGGAGGATGCAAGCGTTATTCGGAATTATTGGGCGTAAAGCGTCTGTAGGTTGCTTTTTAAGTCTACTGTTAAATATTAAGGCTTAACCTTAAAGAAGCGGTATGAGACTAAAAAGCTTGAGTTTAGTAGAGGTAGAGGGAATTCTCGGTGTAGTGGTGAAATGCGTAGAAATCGAGAAGAACACCAGTAGCGAAGGCGCTCTACTGGGCTAAAACTGACACTGAGAGACGAAAGCTAGGGGAGCAAATAGG
O-ASV47	Bacteria, Cyanobacteria, Oxyphotobacteria, Chloroplast, Ostreobium HV05042	Ostreobium sp HV05042	KY509314.1	0.9606	TACGGAGGATGCAAGCGTTATTCGGAATTATTGGGCGTAAAGCGTCTGTAGGTTGCTTTTTAAGTCTACTGTTAAATGTTAAGGCCTAACCTTAAAAGAGCGGTATGAAACTAAAAAGCTTGAGTTTAGTAGAGGTAGAGGGAATTCTCGGTGTAGTGGTGAAATGCGTAGAGATCGAGAAGAACACCAGTTGCGAAAGCGCTCTGCTGGGCTAATACTGACACTGAGAGACGAAAGCTAGGGGAGCAAATAGG
